# Supplementary material
Source: Springer Nature journal article supplement (https://www.springermedizin.de/resource/supplementary/12876_2013_1091_MOESM2_ESM.pdf/9438422)
Supplement: MOESM2 [file 9438422]

**Table 2: Demographic Characteristics of the Participants**

|                                                   | <b>Supplementation Group (n=103)</b> | <b>Placebo Group (n=112)</b> | <b>P</b> |
|---------------------------------------------------|--------------------------------------|------------------------------|----------|
| <b>Mean age in years</b>                          | 37+/-13                              | 37.1+/-13                    | 0.869    |
| <b>Number of females n (%)</b>                    | 70(68.0)                             | 71(63.4)                     | 0.566    |
| <b>Level of education n (%)</b>                   |                                      |                              |          |
| <b>Primary</b>                                    | 73(70.9)                             | 88(78.5)                     | 0.333    |
| <b>Secondary or better</b>                        | 30(29.1)                             | 24(21.4)                     |          |
| <b>Mean Body Mass Index (kg/m<sup>2</sup>)</b>    | 22.6+/-3.8                           | 22.8+/-5.9                   | 0.581    |
| <b>HIV positive n=66 (%)</b>                      | 32 (48.4)                            | 34 (51.5)                    | 0.592    |
| <b>Mean Middle Upper Arm Circumference (MUAC)</b> | 27.3+/-3.3                           | 27.4+/-4.2                   | 0.705    |
| <b>Mean Body fat (kg)</b>                         | 29.9+/-9.4                           | 29.5+/-9.8                   | 0.547    |
| <b>Mean Lean mass (kg)</b>                        | 70.0+/-9.3                           | 69.9+/-11.0                  | 0.630    |
| <b>Median (IQR) follow up (months)</b>            | 18(16-19)                            | 19(18-20)                    | 0.0001   |
| <b>pH n=121</b>                                   | 3.3+/-2.2                            | 3.2+/-2.2                    | 0.881    |
| <b>Tobacco use n (%)</b>                          | 15 (14.5)                            | 23 (20.5)                    | 0.286    |
| <b>Cannabis n (%)</b>                             | 4 (3.8)                              | 2 (1.8)                      | 0.430    |
| <b>Alcohol n (%):</b>                             |                                      |                              |          |
| <b>    everyday</b>                               | 12 (11.6)                            | 18 (16.1)                    | 0.661    |
| <b>    not everyday</b>                           | 39 (37.9)                            | 33 (29.5)                    |          |
